# Supplementary material for: Early Improvement in Work Productivity Predicts Future Clinical Course in Depressed Outpatients: Findings From the CO-MED Trial
Source: Atypon-hosted journal article supplement (doi:10.1176/appi.ajp.2016.16020176), 2016-08-13
Supplement: appi.ajp.2016.16020176.ds001.pdf [file appi.ajp.2016.16020176.ds001.pdf]

Supplementary Table 1. Clinical and sociodemographic predictors of changes in work productivity outcomes during acute- and continuation-phases of CO-MED trial.

|                                               | Absenteeism   |      | Presenteeism  |      | Work Productivity Loss |      |
|-----------------------------------------------|---------------|------|---------------|------|------------------------|------|
|                                               | Estimate      | SE   | Estimate      | SE   | Estimate               | SE   |
| <b><u>Acute-phase</u></b>                     |               |      |               |      |                        |      |
| Age                                           | 0.09          | 0.05 | 0.16          | 0.08 | 0.14                   | 0.09 |
| Gender                                        | 0.52          | 1.33 | -1.57         | 2.16 | -2.29                  | 2.28 |
| Hispanic ethnicity                            | -0.15         | 1.48 | 2.76          | 2.49 | 2.16                   | 2.65 |
| Race <sup>a</sup> black                       | 1.44          | 1.49 | 1.26          | 2.42 | 0.97                   | 2.54 |
| Race <sup>a</sup> other                       | 1.08          | 2.07 | 1.68          | 3.46 | 2.64                   | 3.57 |
| Education <sup>b</sup> : 12 – 15 years        | -3.62         | 2.02 | <b>-8.10*</b> | 3.32 | <b>-10.49**</b>        | 3.47 |
| Education <sup>b</sup> : 16 years or more     | <b>-5.44*</b> | 2.21 | <b>-8.55*</b> | 3.65 | <b>-10.89**</b>        | 3.81 |
| Depression onset before age 18                | 1.21          | 1.18 | -0.60         | 1.94 | -0.11                  | 2.02 |
| Suicidal ideation at baseline                 | 0.79          | 1.24 | -1.47         | 2.04 | -2.23                  | 2.13 |
| Anxious depression at baseline                | -0.24         | 1.26 | 0.07          | 2.10 | 0.65                   | 2.19 |
| Bupropion combination <sup>c</sup>            | -0.51         | 1.40 | 2.52          | 2.30 | 1.77                   | 2.41 |
| Venlafaxine combination <sup>c</sup>          | 0.41          | 1.38 | 1.74          | 2.29 | 1.45                   | 2.38 |
| Monthly income <sup>d</sup> : \$2000 - \$4000 | 0.09          | 1.35 | 2.88          | 2.22 | 3.40                   | 2.30 |

|                                           |                |      |                |      |                |      |
|-------------------------------------------|----------------|------|----------------|------|----------------|------|
| Monthly income <sup>d</sup> : > \$4000    | -2.14          | 1.63 | 0.35           | 2.62 | -1.56          | 2.81 |
| Baseline QIDS-SR                          | -0.01          | 0.19 | -0.30          | 0.31 | -0.04          | 0.32 |
| Baseline CPFQ                             | 0.11           | 0.13 | 0.12           | 0.22 | 0.01           | 0.23 |
| QIDS-SR (weeks 1-12)                      | <b>0.64***</b> | 0.14 | <b>1.73***</b> | 0.18 | <b>1.91***</b> | 0.21 |
| CPFQ (weeks 1-12)                         | 0.01           | 0.11 | <b>0.79***</b> | 0.13 | <b>0.77***</b> | 0.15 |
| Baseline absenteeism                      | <b>0.17***</b> | 0.03 |                |      |                |      |
| Baseline presenteeism                     |                |      | <b>0.27***</b> | 0.03 |                |      |
| Baseline work productivity loss           |                |      |                |      | <b>0.26***</b> | 0.03 |
| <b><u>Continuation-phase</u></b>          |                |      |                |      |                |      |
| Age                                       | 0.04           | 0.07 | -0.02          | 0.07 | -0.04          | 0.09 |
| Gender                                    | -0.38          | 1.78 | -0.63          | 1.83 | -0.55          | 2.31 |
| Hispanic ethnicity                        | 1.24           | 1.93 | -0.52          | 2.10 | 0.78           | 2.55 |
| Race <sup>a</sup> black                   | -3.00          | 2.20 | 0.65           | 2.27 | -1.04          | 2.86 |
| Race <sup>a</sup> other                   | 1.29           | 2.51 | -4.36          | 2.64 | -3.06          | 3.28 |
| Education <sup>b</sup> : 12 – 15 years    | -3.01          | 2.60 | 0.86           | 2.82 | 2.60           | 3.42 |
| Education <sup>b</sup> : 16 years or more | -1.01          | 2.78 | 0.62           | 3.05 | 1.47           | 3.68 |
| Depression onset before age 18            | 0.97           | 1.49 | -0.23          | 1.59 | -1.41          | 1.95 |
| Suicidal ideation at baseline             | 0.60           | 1.65 | -1.20          | 1.77 | -1.46          | 2.17 |

|                                               |                |      |                |      |                |      |
|-----------------------------------------------|----------------|------|----------------|------|----------------|------|
| Anxious depression at baseline                | -1.16          | 1.63 | 0.73           | 1.75 | -1.08          | 2.16 |
| Bupropion combination <sup>c</sup>            | -2.33          | 1.77 | -0.32          | 1.86 | -1.47          | 2.31 |
| Venlafaxine combination <sup>c</sup>          | -1.62          | 1.85 | -1.16          | 1.90 | -2.68          | 2.38 |
| Monthly income <sup>d</sup> : \$2000 - \$4000 | -0.95          | 1.76 | -1.49          | 1.87 | -0.16          | 2.27 |
| Monthly income <sup>d</sup> : > \$4000        | -1.72          | 2.00 | 2.60           | 2.01 | 3.20           | 2.60 |
| Baseline QIDS-SR                              | -0.40          | 0.21 | -0.30          | 0.23 | -0.49          | 0.28 |
| Baseline absenteeism                          | <b>0.18***</b> | 0.04 |                |      |                |      |
| Baseline presenteeism                         |                |      | <b>0.13***</b> | 0.03 |                |      |
| Baseline work productivity loss               |                |      |                |      | <b>0.16***</b> | 0.03 |
| Week 12 QIDS-SR                               | -0.02          | 0.33 | 0.05           | 0.35 | 0.32           | 0.43 |
| Week 12 CPFQ                                  | -0.22          | 0.25 | -0.20          | 0.25 | -0.23          | 0.32 |
| QIDS-SR (weeks 16-28)                         | <b>0.77**</b>  | 0.27 | <b>1.16***</b> | 0.28 | <b>1.54***</b> | 0.36 |
| CPFQ (weeks 16-28)                            | <b>0.70**</b>  | 0.25 | <b>1.70***</b> | 0.26 | <b>1.93***</b> | 0.32 |
| Week 12 absenteeism                           | -0.02          | 0.05 |                |      |                |      |
| Week 12 presenteeism                          |                |      | <b>0.23***</b> | 0.04 |                |      |
| Week 12 work productivity loss                |                |      |                |      | <b>0.16***</b> | 0.04 |

\* p Value < 0.05, \*\* p Value <0.005, \*\*\* p Value <0.0001 Work productivity loss is percent overall work impairment (absenteeism or presenteeism), presenteeism is percent impairment while working due to health, and absenteeism is percent of time missed from work due to general health. Est. is estimate, SE

is standard error. Comparison group for a) race is white, b) education is less than high school, c) treatment arm is selective serotonin reuptake inhibitor (SSRI) monotherapy with Escitalopram plus placebo, and d) monthly income is less than \$2000. Bupropion combination refers to sustained-release bupropion plus escitalopram combination, Venlafaxine combination refers to extended-release venlafaxine plus mirtazapine, and QIDS-SR is Quick Inventory of Depressive Symptomatology Self-Report.

Supplementary Table 2. Model development of changes in work productivity loss with 6 weeks of treatment

| Number of Groups | Order of Polynomials | Bayesian information criteria (BIC) | Akaike information criteria (AIC) |
|------------------|----------------------|-------------------------------------|-----------------------------------|
| 2                | 1, 1                 | -5157                               | -5146                             |
|                  | 2, 2                 | -5154                               | -5139                             |
|                  | 2, 1                 | -5152                               | -5139                             |
|                  | 3, 3                 | -5150                               | -5131                             |
|                  | 4, 4                 | -5156                               | -5133                             |
|                  | 1, 0                 | -5162                               | -5152                             |
| 3                | 1, 1, 1              | -5135                               | -5118                             |
|                  | 2, 2, 2              | -5138                               | -5116                             |
|                  | 2, 0, 1              | -5134                               | -5117                             |
|                  | 3, 3, 3              | -5136                               | -5108                             |
| Final model      | 3, 1, 3              | -5132                               | -5107                             |
|                  | 4, 4, 4              | -5145                               | -5111                             |
|                  | 1, 0, 0              | -5141                               | -5128                             |
|                  | 3, 3, 4              | -5139                               | -5109                             |

|   |            |       |       |
|---|------------|-------|-------|
|   | 3, 3, 2    | -5136 | -5109 |
|   | 3, 2, 3    | -5135 | -5108 |
| 4 | 1, 1, 1, 1 | -5132 | -5109 |
|   | 1, 0, 1, 0 | -5127 | -5108 |
|   | 2, 2, 2, 2 | -5135 | -5105 |
|   | 0, 1, 1, 0 | -5127 | -5108 |
|   | 3, 3, 3, 3 | -5143 | -5105 |
|   | 0, 3, 1, 0 | -5125 | -5102 |
|   | 4, 4, 4, 4 | -5152 | -5107 |
|   | 0, 4, 4, 4 | -5141 | -5103 |
|   | 0, 1, 4, 4 | -5138 | -5106 |
|   | 0, 1, 3, 4 | -5136 | -5107 |
|   | 0, 1, 3, 2 | -5131 | -5105 |
|   | 0, 1, 3, 1 | -5129 | -5104 |
|   | 0, 1, 3, 0 | -5126 | -5103 |
|   | 0, 2, 3, 0 | -5126 | -5099 |
|   | 1, 3, 3, 0 | -5129 | -5104 |

|   |               |       |       |
|---|---------------|-------|-------|
|   | 2, 3, 3, 0    | -5132 | -5102 |
|   | 1, 3, 3, 1    | -5132 | -5102 |
| 5 | 1, 1, 1, 1, 1 | -5136 | -5107 |
|   | 2, 2, 2, 2, 2 | -5140 | -5102 |

Supplementary Table 3. Maximum likelihood estimates of 3 class 3-degree censored normal model (3, 1, 3) of trajectories of work productivity change during the first 6 weeks of Combining Medications to Enhance Depression Outcomes (CO-MED) trial

| Group                                                                                  | Parameter | Estimate  | Standard Error | T for H0: Parameter=0 | Prob >  T |
|----------------------------------------------------------------------------------------|-----------|-----------|----------------|-----------------------|-----------|
| 1                                                                                      | Intercept | 23.61134  | 4.51033        | 5.235                 | 0.0000    |
|                                                                                        | Linear    | -55.46913 | 11.57674       | -4.791                | 0.0000    |
|                                                                                        | Quadratic | 19.13004  | 4.71155        | 4.060                 | 0.0001    |
|                                                                                        | Cubic     | -1.84798  | 0.50903        | -3.630                | 0.0003    |
| 2                                                                                      | Intercept | 32.22176  | 3.85415        | 8.360                 | 0.0000    |
|                                                                                        | Linear    | -1.58918  | 0.68581        | -2.317                | 0.0206    |
| 3                                                                                      | Intercept | 80.18164  | 4.71225        | 17.016                | 0.0000    |
|                                                                                        | Linear    | -22.14253 | 6.84666        | -3.234                | 0.0013    |
|                                                                                        | Quadratic | 7.72452   | 2.96803        | 2.603                 | 0.0094    |
|                                                                                        | Cubic     | -0.77318  | 0.32950        | -2.347                | 0.0191    |
|                                                                                        |           |           |                |                       |           |
|                                                                                        | Sigma     | 29.64576  | 0.78880        | 37.584                | 0.0000    |
| Bayesian Information Criterion (BIC)= -5132; Akaike Information Criterion (AIC)= -5107 |           |           |                |                       |           |



Supplementary Table 4. Differences in baseline clinical and sociodemographic variables amongst the three groups identified by trajectories of changes in work productivity loss during the first 6 weeks of Combining Medications to Enhance Depression Outcomes (CO-MED) trial

|                       | Robust Early Improvement |        | Minimal Change |        | High-Impairment Slight Reduction |        | Test statistic* |    | p-Value |
|-----------------------|--------------------------|--------|----------------|--------|----------------------------------|--------|-----------------|----|---------|
|                       | Mean                     | SD     | Mean           | SD     | Mean                             | SD     | F value         | df |         |
| Continuous variables  |                          |        |                |        |                                  |        |                 |    |         |
| Age in years          | 42.9                     | 12.7   | 40.9           | 13.0   | 39.5                             | 11.5   | 1.5             | 2  | 0.23    |
| Monthly income in USD | 3281.0                   | 4557.1 | 3911.4         | 8420.8 | 2827.2                           | 2734.4 | 0.76            | 2  | 0.47    |
| QIDS-SR               | 13.5                     | 4.0    | 14.5           | 4.1    | 17.1                             | 3.4    | 18.3            | 2  | <0.001  |
| Categorical variables | n                        | %      | n              | %      | n                                | %      | $\chi^2$        | df |         |
| Sex                   |                          |        |                |        |                                  |        | 1.02            | 2  | 0.60    |
| Male                  | 18                       | 18.8   | 54             | 56.3   | 24                               | 25     |                 |    |         |
| Female                | 54                       | 23.0   | 119            | 50.6   | 62                               | 26.4   |                 |    |         |
| Race                  |                          |        |                |        |                                  |        | 3.73            | 6  | 0.71    |
| White                 | 58                       | 25.4   | 39             | 17.1   | 93                               | 40.8   |                 |    |         |
| Black                 | 18                       | 24     | 13             | 17.3   | 26                               | 34.7   |                 |    |         |
| Other                 | 8                        | 28.6   | 4              | 14.3   | 13                               | 46.4   |                 |    |         |
| Education             |                          |        |                |        |                                  |        | 6.27            | 4  | 0.18    |

|                                            |    |      |     |      |    |      |      |   |      |
|--------------------------------------------|----|------|-----|------|----|------|------|---|------|
| <12 years                                  | 5  | 15.2 | 15  | 45.5 | 13 | 39.4 |      |   |      |
| 12 -15 years                               | 42 | 24.7 | 83  | 48.8 | 45 | 26.5 |      |   |      |
| >15 years                                  | 23 | 19.8 | 68  | 58.6 | 25 | 21.6 |      |   |      |
| Treatment Arm                              |    |      |     |      |    |      | 4.49 | 4 | 0.34 |
| Bupropion Combination                      | 23 | 19.3 | 68  | 57.1 | 28 | 23.5 |      |   |      |
| SSRI Monotherapy                           | 20 | 20.2 | 55  | 55.6 | 24 | 24.2 |      |   |      |
| Venlafaxine Combination                    | 29 | 25.7 | 50  | 44.3 | 34 | 30.1 |      |   |      |
|                                            | N  | Y    | N   | Y    | N  | Y    |      |   |      |
| Hispanic (N/Y)                             | 56 | 16   | 144 | 29   | 66 | 20   | 1.92 | 2 | 0.38 |
| Anxious features (N/Y)                     | 25 | 47   | 49  | 124  | 18 | 67   | 3.59 | 2 | 0.17 |
| Suicidal ideation, (N/Y)                   | 33 | 39   | 73  | 100  | 29 | 57   | 2.68 | 2 | 0.26 |
| Onset of depression<br>before age 18 (N/Y) | 37 | 35   | 98  | 75   | 42 | 43   | 1.39 | 2 | 0.50 |

$\chi^2$  is chi-square, SD is standard deviation, df is degrees of freedom, n is number, N is no or absent, Y is

yes or present, Bupropion combination is sustained-release bupropion plus escitalopram, SSRI

monotherapy is escitalopram plus placebo, Venlafaxine combination is extended-release venlafaxine

plus mirtazapine, and QIDS-SR is Quick Inventory of Depressive Symptomatology Self-Report.

Supplementary Table 5. Prediction of short and longer-term remission outcomes in univariates and multivariate analyses

|                                                               | Remission at 3 months |             | Remission at 7 months |             |
|---------------------------------------------------------------|-----------------------|-------------|-----------------------|-------------|
|                                                               | Odds Ratio            | 95% CI      | Odds Ratio            | 95% CI      |
| Univariate analysis                                           |                       |             |                       |             |
| Trajectory Group                                              |                       |             |                       |             |
| Robust early improvement vs. minimal change                   | 3.09                  | 1.45, 6.58  | 2.87                  | 1.22, 6.76  |
| Robust early improvement vs. high-impairment slight reduction | 7.69                  | 3.17, 18.52 | 7.14                  | 2.65, 19.23 |
| Treatment-arm                                                 |                       |             |                       |             |
| Bupropion vs. Venlafaxine Combinations                        | 0.84                  | 0.44, 1.62  | 0.77                  | 0.38, 1.55  |
| SSRI monotherapy vs. Venlafaxine Combination                  | 0.62                  | 0.32, 1.20  | 0.89                  | 0.43, 1.84  |
| Race                                                          |                       |             |                       |             |
| White vs. Others                                              | 1.09                  | 0.43, 2.77  | 1.74                  | 0.69, 4.39  |
| Black vs. Others                                              | 0.74                  | 0.25, 2.19  | 1.10                  | 0.36, 3.35  |
| Education                                                     |                       |             |                       |             |
| >15 years vs. <12 years                                       | 0.77                  | 0.27, 1.17  | 0.84                  | 0.29, 2.49  |
| > 15 years vs. 12-15 years                                    | 0.91                  | 0.52, 1.59  | 1.12                  | 0.60, 2.07  |
| Income                                                        |                       |             |                       |             |
| <\$2000/month vs. >\$4000/month                               | 1.39                  | 0.70, 2.70  | 1.14                  | 0.56, 2.35  |
| \$2000-\$4000/month vs. >\$4000/month                         | 1.31                  | 0.61, 2.78  | 1.36                  | 0.61, 3.05  |
| Remission at Week 6                                           | 14.41                 | 6.14, 33.80 | 6.12                  | 2.78, 13.48 |
| Male Gender                                                   | 1.05                  | 0.59, 1.88  | 0.65                  | 0.35, 1.23  |
| Onset of depression before age 18                             | 0.86                  | 0.51, 1.47  | 1.08                  | 0.60, 1.93  |

|                                                               |       |             |      |             |
|---------------------------------------------------------------|-------|-------------|------|-------------|
| Hispanic ethnicity                                            | 1.57  | 0.79, 3.06  | 3.79 | 1.58, 9.09  |
| Presence of anxious features                                  | 0.90  | 0.50, 1.62  | 1.44 | 0.76, 2.72  |
| Presence of suicidal ideations                                | 0.50  | 0.29, 0.87  | 0.46 | 0.25, 0.84  |
| Baseline depression severity                                  | 0.88  | 0.82, 0.84  | 0.91 | 0.84, 0.99  |
| Baseline CPFQ score                                           | 0.92  | 0.87, 0.97  | 0.94 | 0.89, 1.0   |
|                                                               |       |             |      |             |
| Multivariate analysis with backwards elimination              |       |             |      |             |
| Trajectory Group                                              |       |             |      |             |
| Robust early improvement vs. minimal change                   | 2.67  | 1.02, 6.94  | 2.15 | 0.75, 6.13  |
| Robust early improvement vs. high-impairment slight reduction | 5.35  | 1.81, 15.87 | 5.03 | 1.53, 16.39 |
| Remission at Week 6                                           | 13.60 | 5.37, 34.45 | 6.51 | 2.62, 16.17 |
| Hispanic ethnicity                                            |       |             | 3.86 | 1.43, 10.42 |
